# Supplementary material for: Multi-color afterglow of the LiGa5O8:Tb3+/Sm3+ co-doped gallosilicate glass via energy transfer and trap sharing for optical anti-counterfeiting
Source: Royal Society of Chemistry journal article supplement (doi:10.1039/d4tc03171g), 2024-01-01
Supplement: d4tc03171g1.pdf [file d4tc03171g1.pdf]

## Supporting Information

### **Multi-color afterglow of the $\text{LiGa}_5\text{O}_8$ : $\text{Tb}^{3+}/\text{Sm}^{3+}$ co-doped gallosilicate glass via energy transfer and trap sharing for optical anti-counterfeiting**

*Jing Li<sup>1</sup>, Dan Zhang<sup>2\*</sup>, Yixi Wu<sup>1</sup>, Lulu Li<sup>1</sup>, Xinlian Zhang<sup>1</sup>, Shiqing Xu<sup>1</sup>, Junjie Zhang<sup>1</sup>*

<sup>1</sup> College of Optical and Electronic Technology, China Jiliang University, Hangzhou 310018, China

<sup>2</sup> College of Quality and Standardization, China Jiliang University, Hangzhou 310018, China

E-mail: zhangdd@cjlu.edu.cn (D. Zhang), jjzhang@cjlu.edu.cn (J. Zhang)

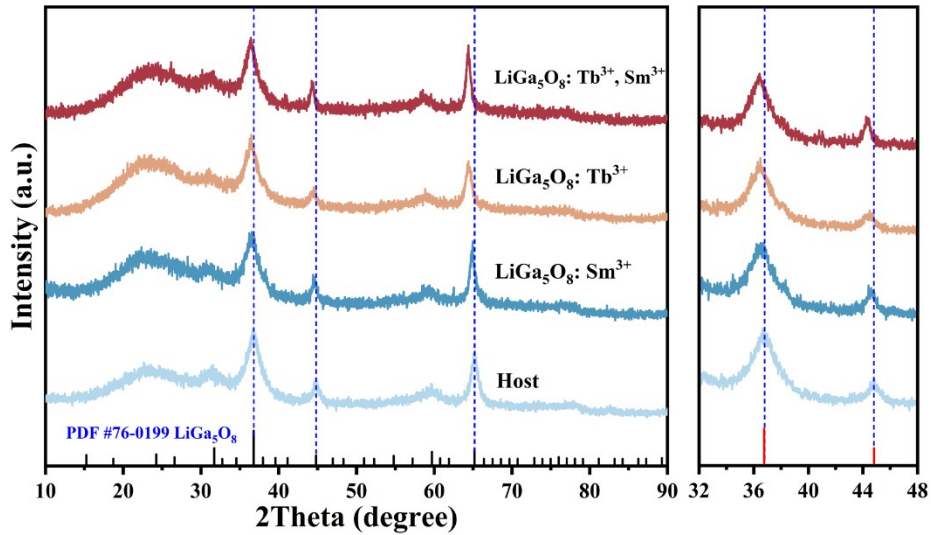

**Figure S1** The detailed XRD results of  $\text{LiGa}_5\text{O}_8: x\text{Tb}^{3+}, y\text{Sm}^{3+}$  samples in the range of  $32\text{-}48^\circ$

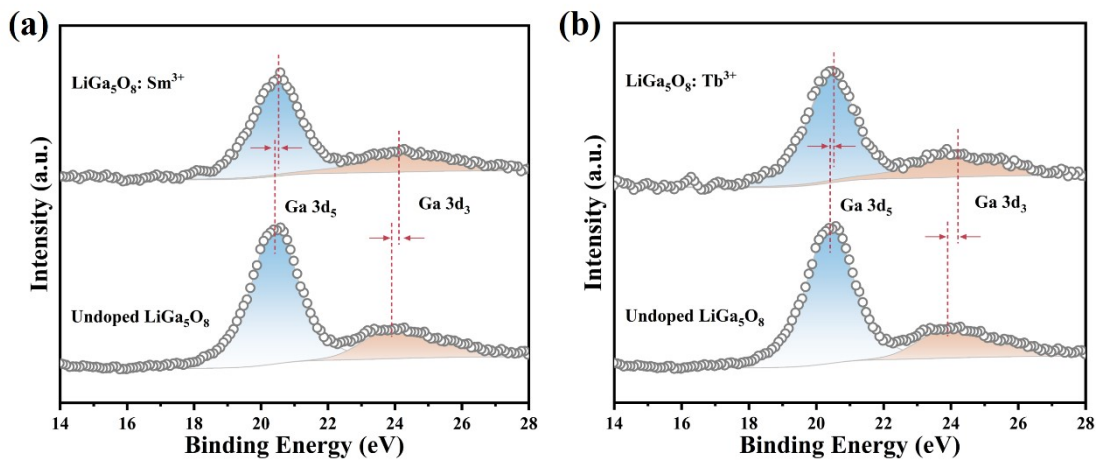

**Figure S2** (a) The high-resolution Ga 3d XPS spectra of undoped and  $\text{Sm}^{3+}$  singly-doped samples. (b) The high-resolution Ga 3d XPS spectra of undoped and  $\text{Tb}^{3+}$  singly-doped samples.

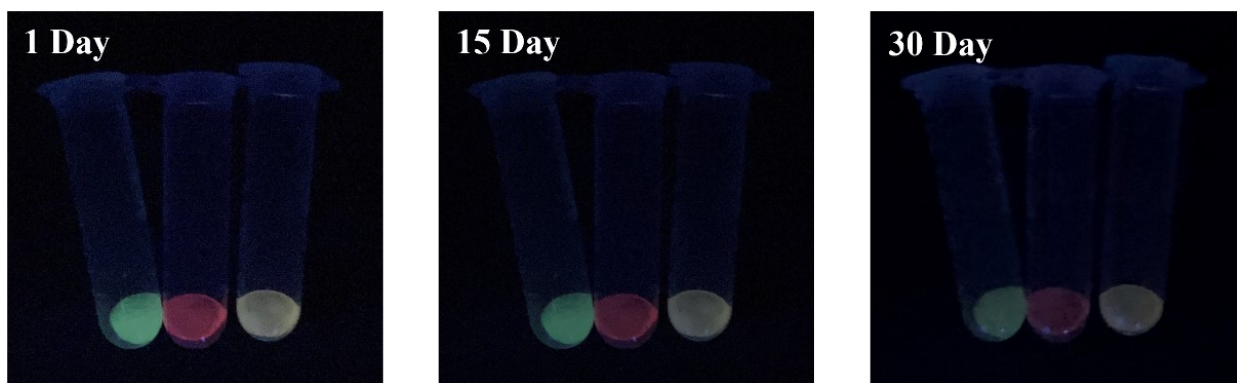

**Figure S3** Afterglow photographs of the three GCs samples in water for days

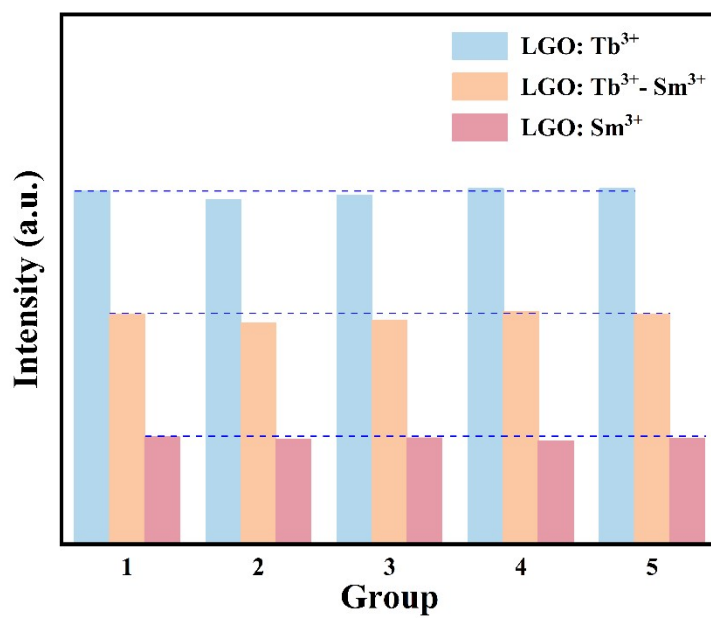

**Figure S4** Average afterglow intensity of the samples after a hundred heating cycles

**Table. S1** The Ga 3d binding energy of the four GCs samples.

| No. | Type of samples                                 | Ga 3d <sub>5</sub> | Ga 3d <sub>3</sub> |
|-----|-------------------------------------------------|--------------------|--------------------|
| I   | Undoped                                         | 20.35              | 23.84              |
| II  | Sm <sup>3+</sup> singly-doped                   | 20.42              | 24.12              |
| III | Tb <sup>3+</sup> singly-doped                   | 20.40              | 24.21              |
| IV  | Tb <sup>3+</sup> -Sm <sup>3+</sup> doubly-doped | 20.56              | 24.41              |
